# Supplementary material
Source: PubMed Central journal article supplement (PMC6572731)

## Supporting Information

### “Modeling Pyran Formation in the Molybdenum Cofactor: Protonation of Quinoxalyl-Dithiolene Promotes Pyran Cyclization”

Douglas R. Gisewhite,<sup>†</sup> Alexandra L. Nagelski,<sup>†</sup> Daniel Cummins,<sup>‡</sup> Glenn P. A. Yap,<sup>‡</sup> Sharon J. N. Burgmayer<sup>†\*</sup>

<sup>†</sup>Department of Chemistry, Bryn Mawr College, Bryn Mawr, Pennsylvania 19010, United States

<sup>‡</sup>Department of Chemistry and Biochemistry, University of Delaware, Newark, Delaware 19716, United States

corresponding author email: [sburgmay@brynmawr.edu](mailto:sburgmay@brynmawr.edu)

#### Contents:

|            |                                                                                                                |         |
|------------|----------------------------------------------------------------------------------------------------------------|---------|
| Figure S1  | <sup>1</sup> H NMR spectrum of BMOQO in chloroform-d.                                                          | Page 1  |
| Figure S2  | <sup>1</sup> H NMR spectrum of [TEA][Tp*Mo(O)(S <sub>2</sub> BMOQO)] <b>2</b> in chloroform-d.                 | Page 2  |
| Figure S3  | <sup>1</sup> H NMR spectrum of [TEA][Tp*Mo(O)(S <sub>2</sub> BMOQO)] <b>2</b> in acetonitrile-d <sup>3</sup> . | Page 3  |
| Figure S4  | HSQC of [TEA][Tp*Mo(O)(S <sub>2</sub> BMOQO)] <b>2</b> in chloroform-d.                                        | Page 4  |
| Figure S5  | HSQC of [TEA][Tp*Mo(O)(S <sub>2</sub> BMOQO)] <b>2</b> in acetonitrile-d <sup>3</sup> .                        | Page 5  |
| Figure S6  | <sup>1</sup> H NMR spectrum of BDMQO in chloroform-d.                                                          | Page 6  |
| Figure S7  | <sup>1</sup> H NMR spectrum of [TEA][Tp*Mo(O)(S <sub>2</sub> BDMQO)] <b>4</b> in chloroform-d.                 | Page 7  |
| Figure S8  | <sup>1</sup> H NMR spectrum of [TEA][Tp*Mo(O)(S <sub>2</sub> BDMQO)] <b>4</b> in acetonitrile-d <sup>3</sup> . | Page 8  |
| Figure S9  | HSQC of [TEA][Tp*Mo(O)(S <sub>2</sub> BDMQO)] <b>4</b> in chloroform-d.                                        | Page 9  |
| Figure S10 | HSQC of [TEA][Tp*Mo(O)(S <sub>2</sub> BDMQO)] <b>4</b> in acetonitrile-d <sup>3</sup> .                        | Page 10 |
| Figure S11 | HSQC of Tp*Mo(O)(pyrano-H-S <sub>2</sub> BMOQO) <b>7</b> in acetonitrile-d <sup>3</sup> .                      | Page 11 |
| Figure S12 | HSQC of Tp*Mo(O)(pyrrolo-S <sub>2</sub> BMOQO) <b>8</b> in acetonitrile-d <sup>3</sup> .                       | Page 12 |
| Figure S13 | UV-vis overlay of <b>2</b> (Blue) and <b>4</b> (Red) in acetonitrile.                                          | Page 13 |
| Figure S14 | Cyclic voltammogram overlay of <b>2</b> (blue) and <b>4</b> (red) in acetonitrile.                             | Page 14 |
| Table S1   | Cyclic voltammometric data for <b>2</b> and <b>4</b> in acetonitrile.                                          | Page 14 |
| Figure S15 | Cyclic voltammogram overlay of Protonated and non-protonated forms of <b>2</b> in chloroform.                  | Page 15 |
| Figure S16 | Cyclic voltammogram overlay of protonated and non-protonated forms of <b>2</b> in acetonitrile.                | Page 15 |
| Figure S17 | Cyclic voltammogram overlay of protonated and non-protonated forms of <b>4</b> in chloroform.                  | Page 16 |
| Figure S18 | Cyclic voltammogram overlay of protonated and non-protonated forms of <b>4</b> in acetonitrile.                | Page 16 |
| Table S2   | Summary of X-ray crystal structure data for complexes <b>2</b> and <b>4</b> .                                  | Page 17 |
| Figure S19 | UV-Vis spectroscopic study of protonation of <b>2</b> in CHCl <sub>3</sub>                                     | Page 18 |

Figure S1.  $^1\text{H}$  NMR spectrum of BMOQO in chloroform-d.

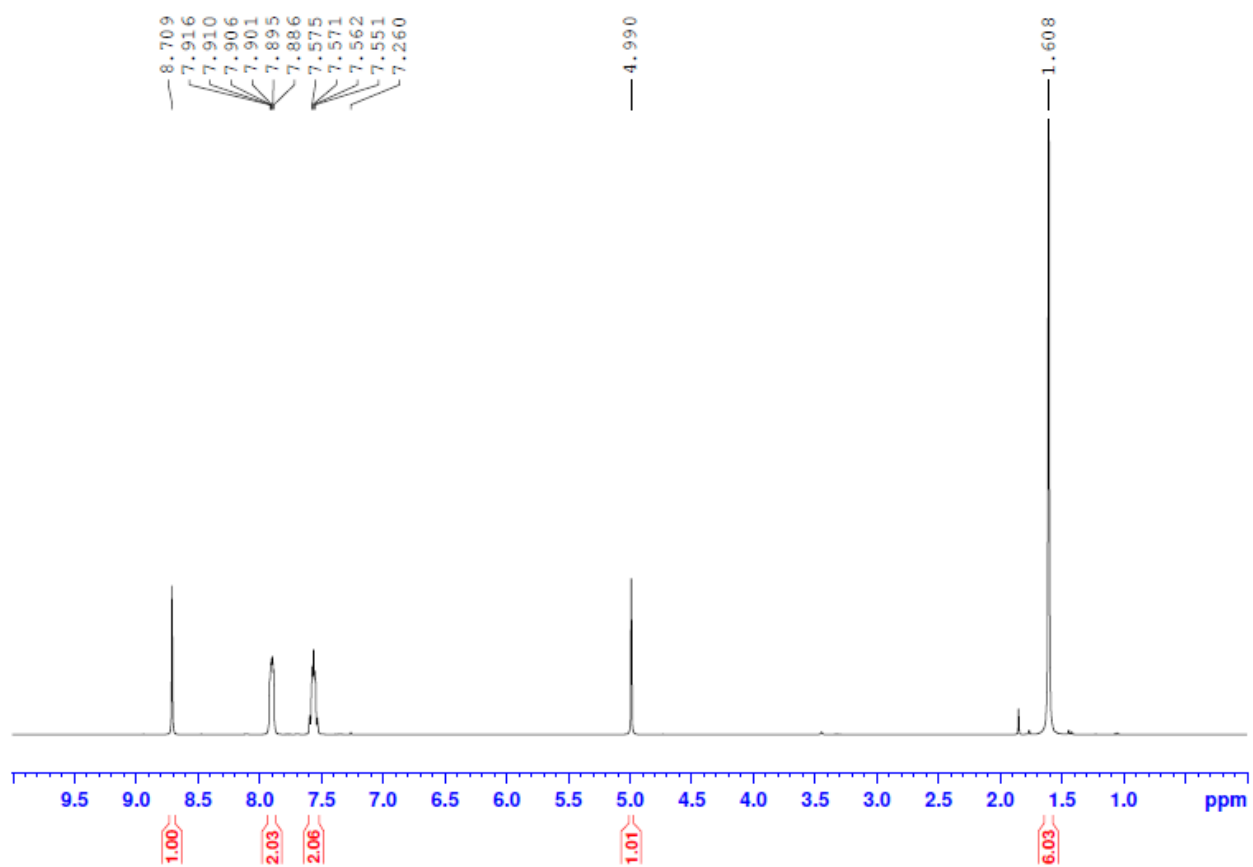

Figure S2.  $^1\text{H}$  NMR spectrum of  $[\text{TEA}][\text{Tp}^*\text{Mo}(\text{O})(\text{S}_2\text{BMOQO})] \mathbf{2}$  in chloroform- $d$ .

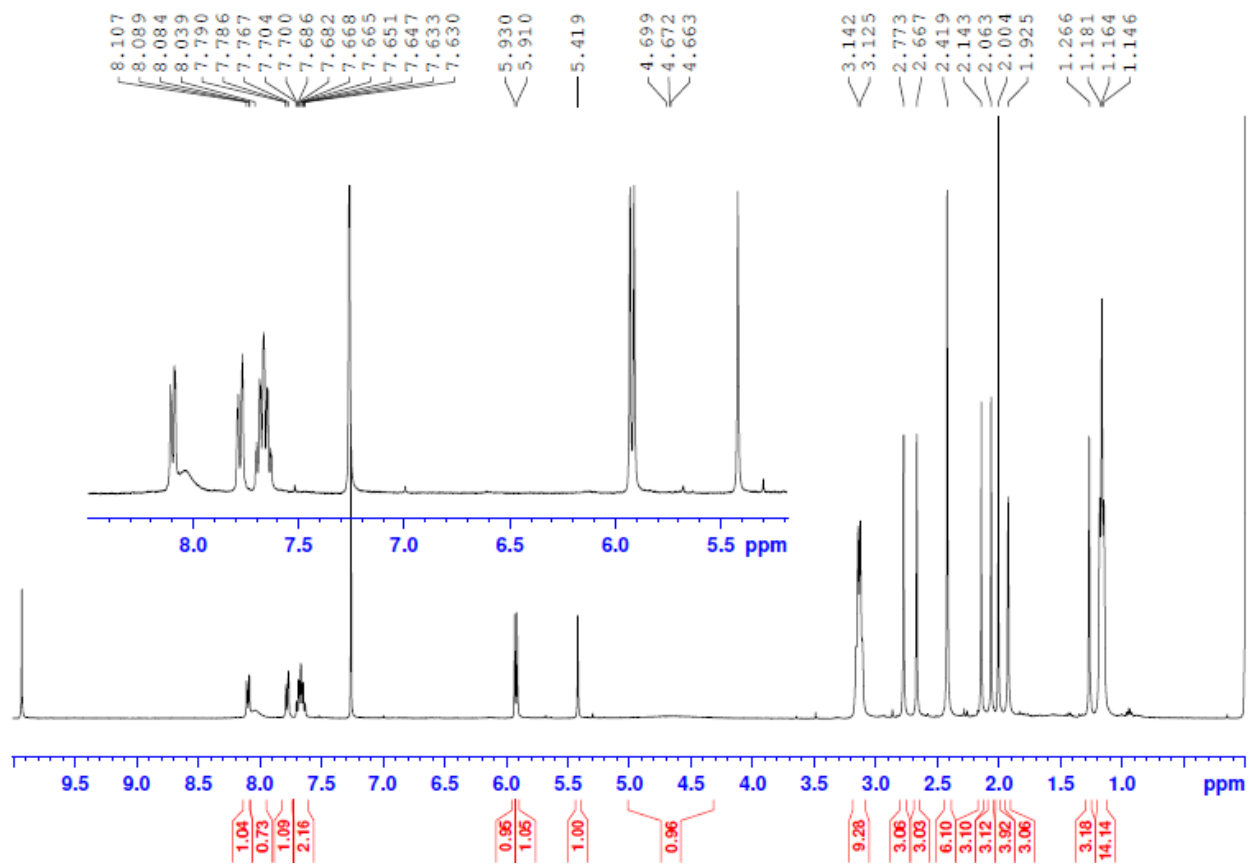

Figure S3.  $^1\text{H}$  NMR spectrum of  $[\text{TEA}][\text{Tp}^*\text{Mo}(\text{O})(\text{S}_2\text{BMOQO})]$  **2** in acetonitrile- $\text{d}_3$ .

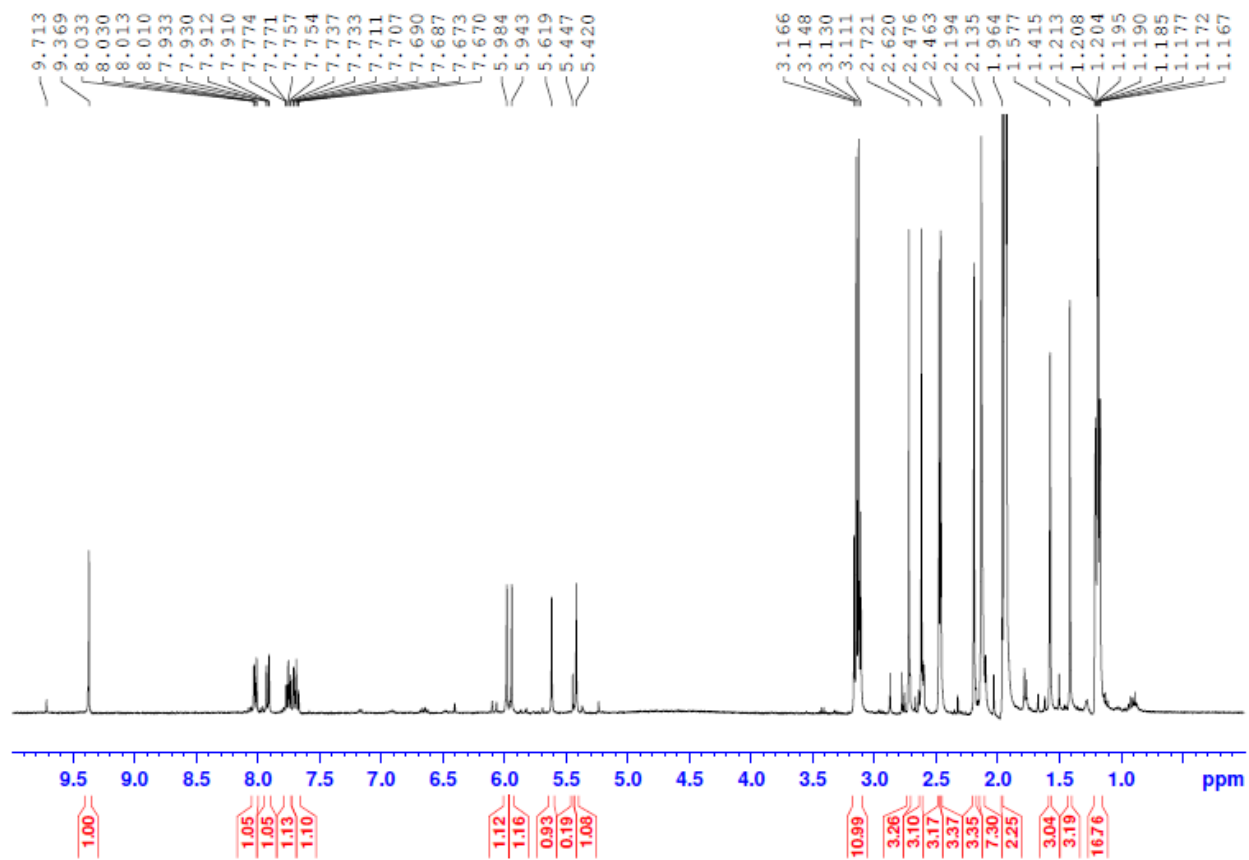

Figure S4. HSQC of [TEA][Tp\*Mo(O)(S<sub>2</sub>BMOQO)] **2** in chloroform-d.

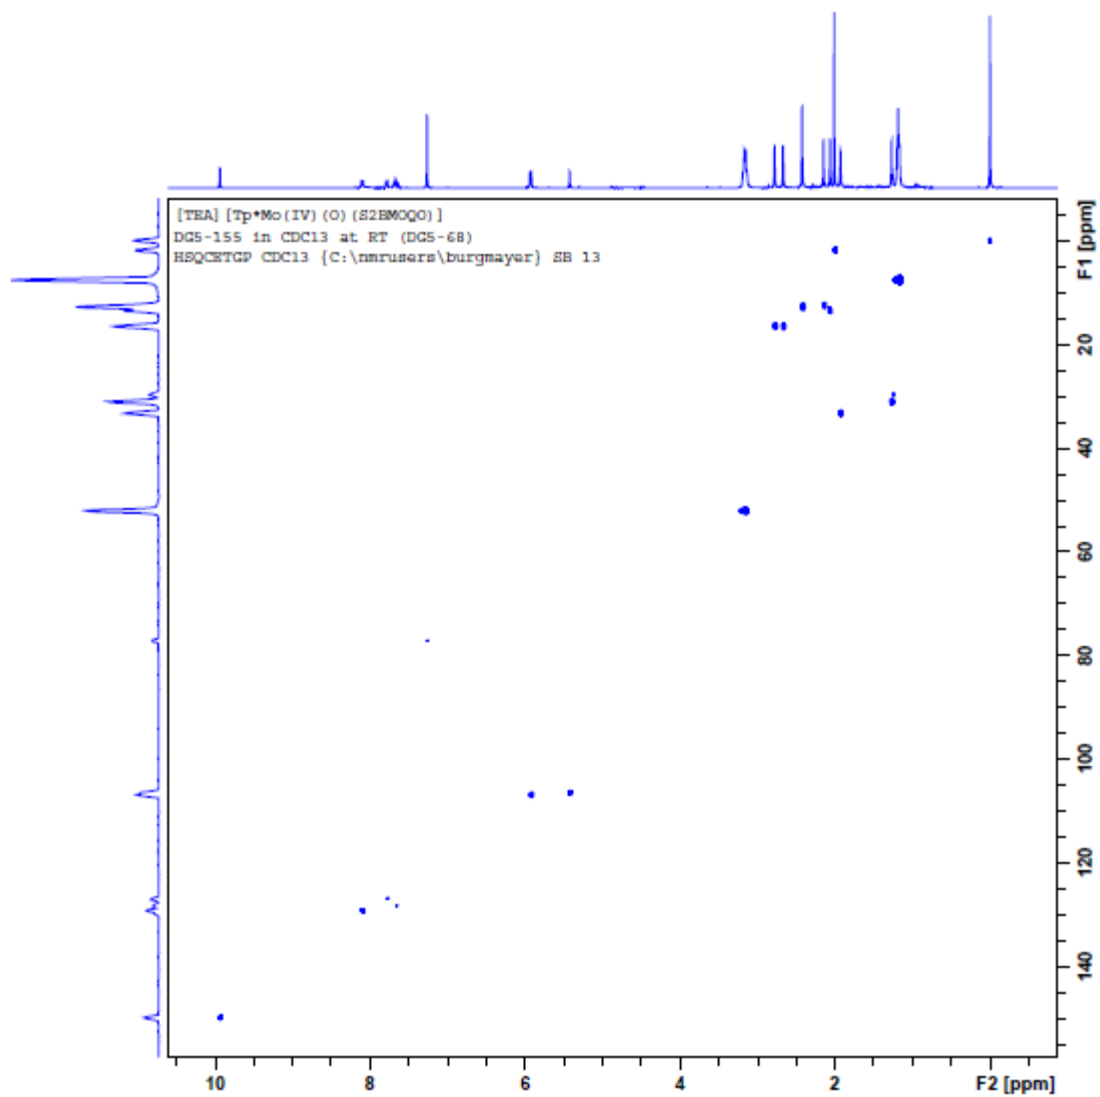

Figure S5. HSQC of [TEA][Tp\*Mo(O)(S<sub>2</sub>BMOQO)] **2** in acetonitrile-d<sup>3</sup>.

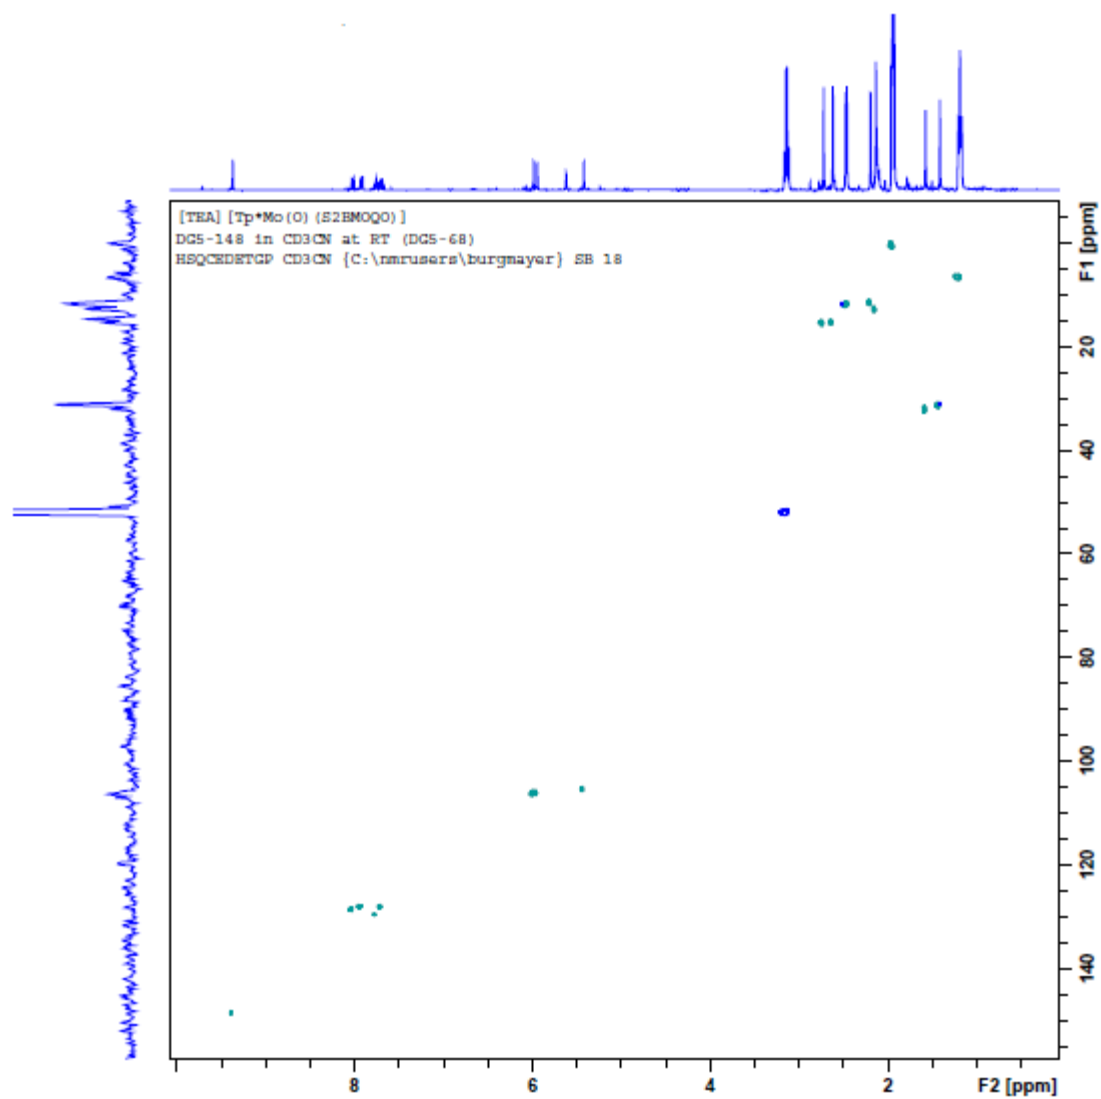

Figure S6.  $^1\text{H}$  NMR spectrum of BDMQO in chloroform-d.

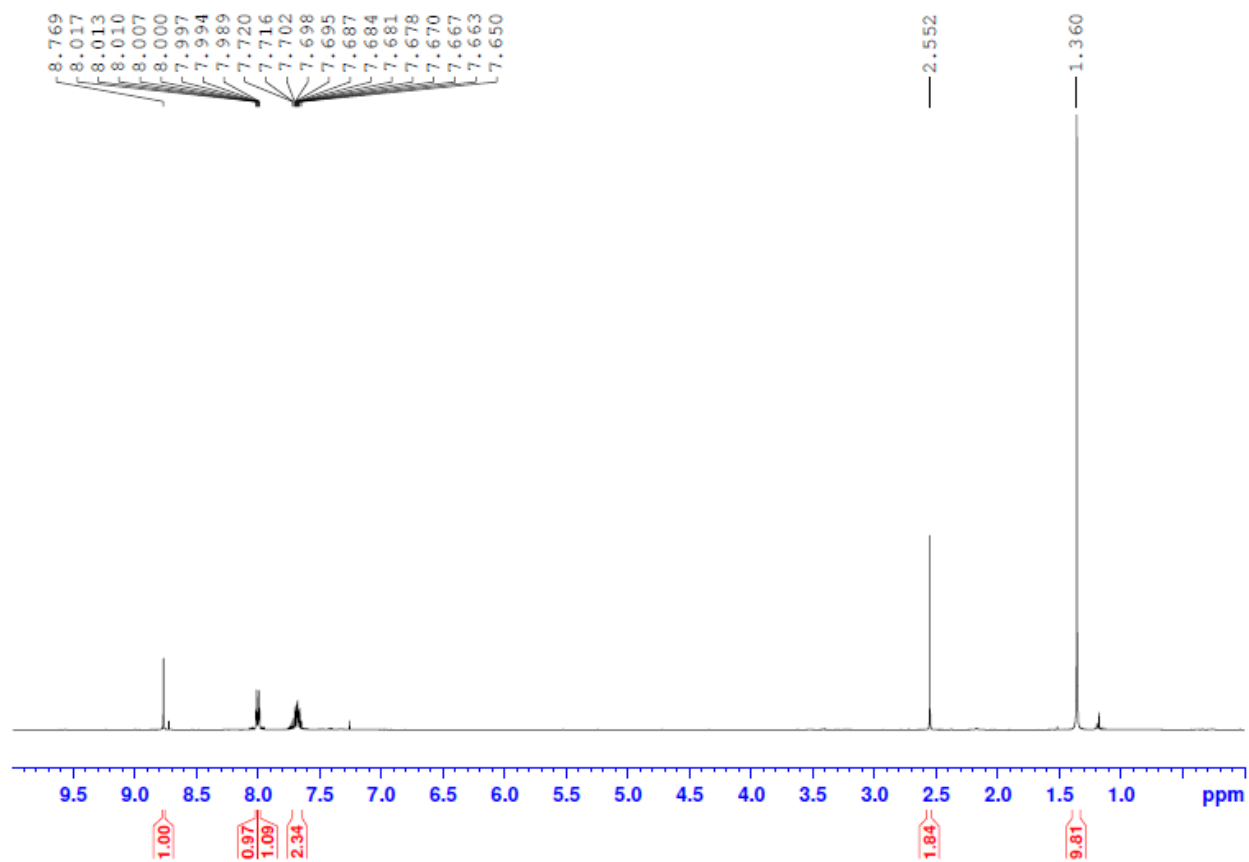

Figure S7.  $^1\text{H}$  NMR spectrum of  $[\text{TEA}][\text{Tp}^*\text{Mo}(\text{O})(\text{S}_2\text{BDMQO})]$  **4** in chloroform-d.

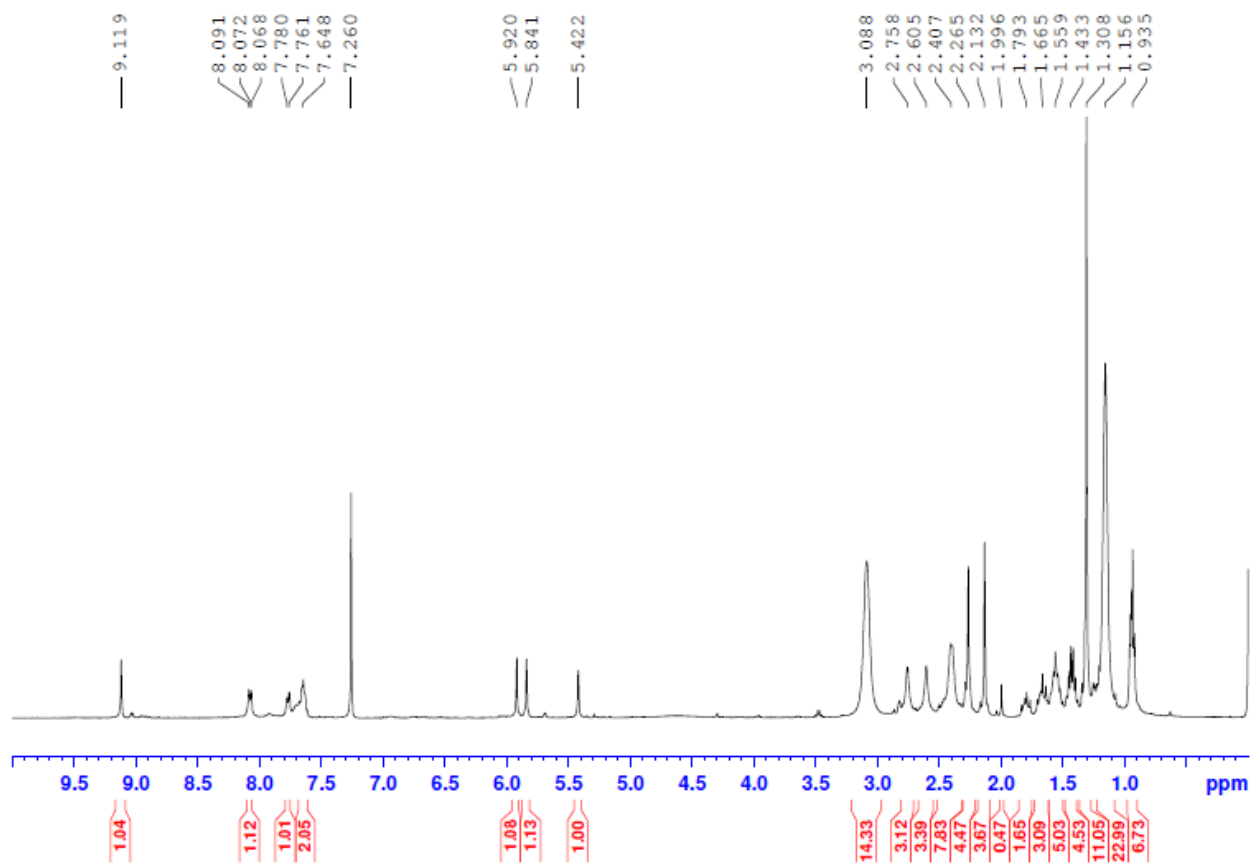



Figure S8.  $^1\text{H}$  NMR spectrum of  $[\text{TEA}][\text{Tp}^*\text{Mo}(\text{O})(\text{S}_2\text{BDMQO})]$  **4** in acetonitrile- $d^3$ .

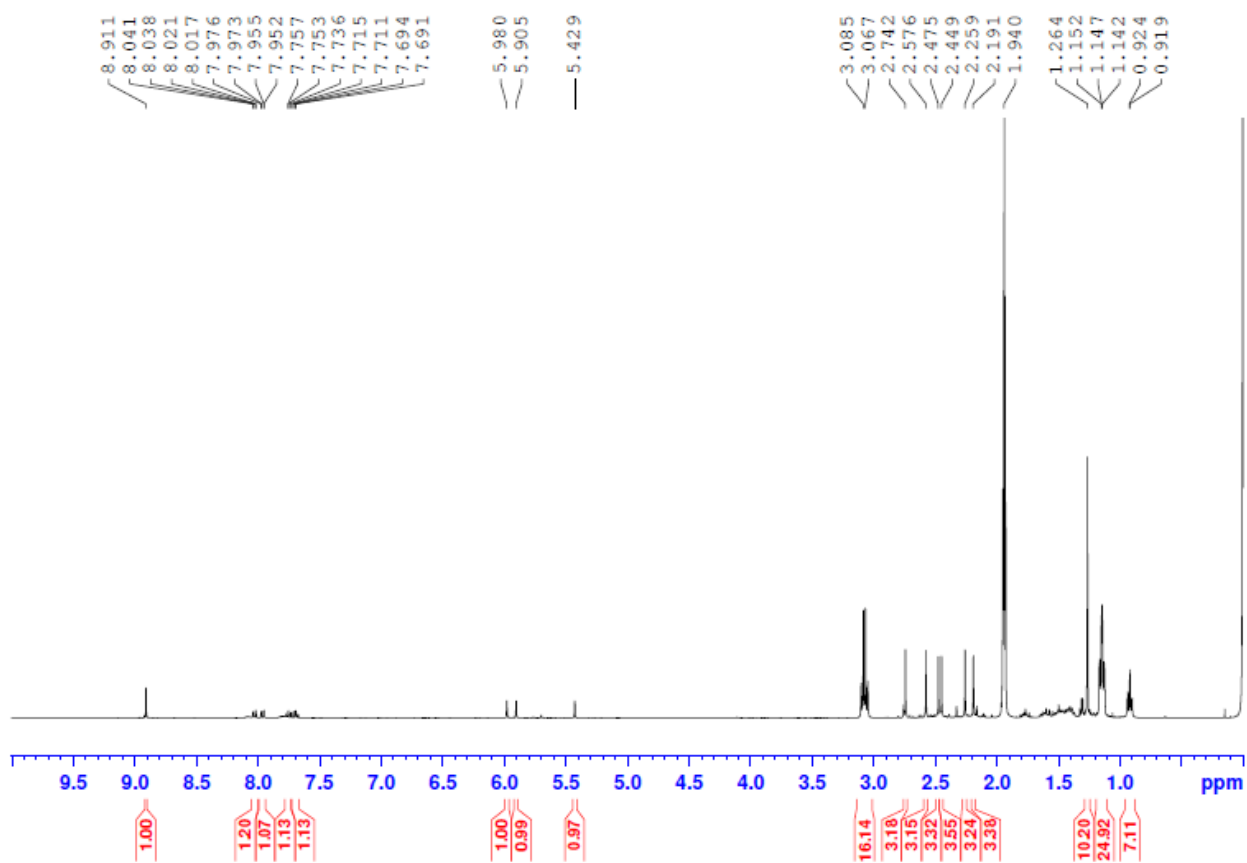

Figure S9. HSQC of [TEA][Tp\*Mo(O)(S<sub>2</sub>BDMQO)] **4** in chloroform-d.

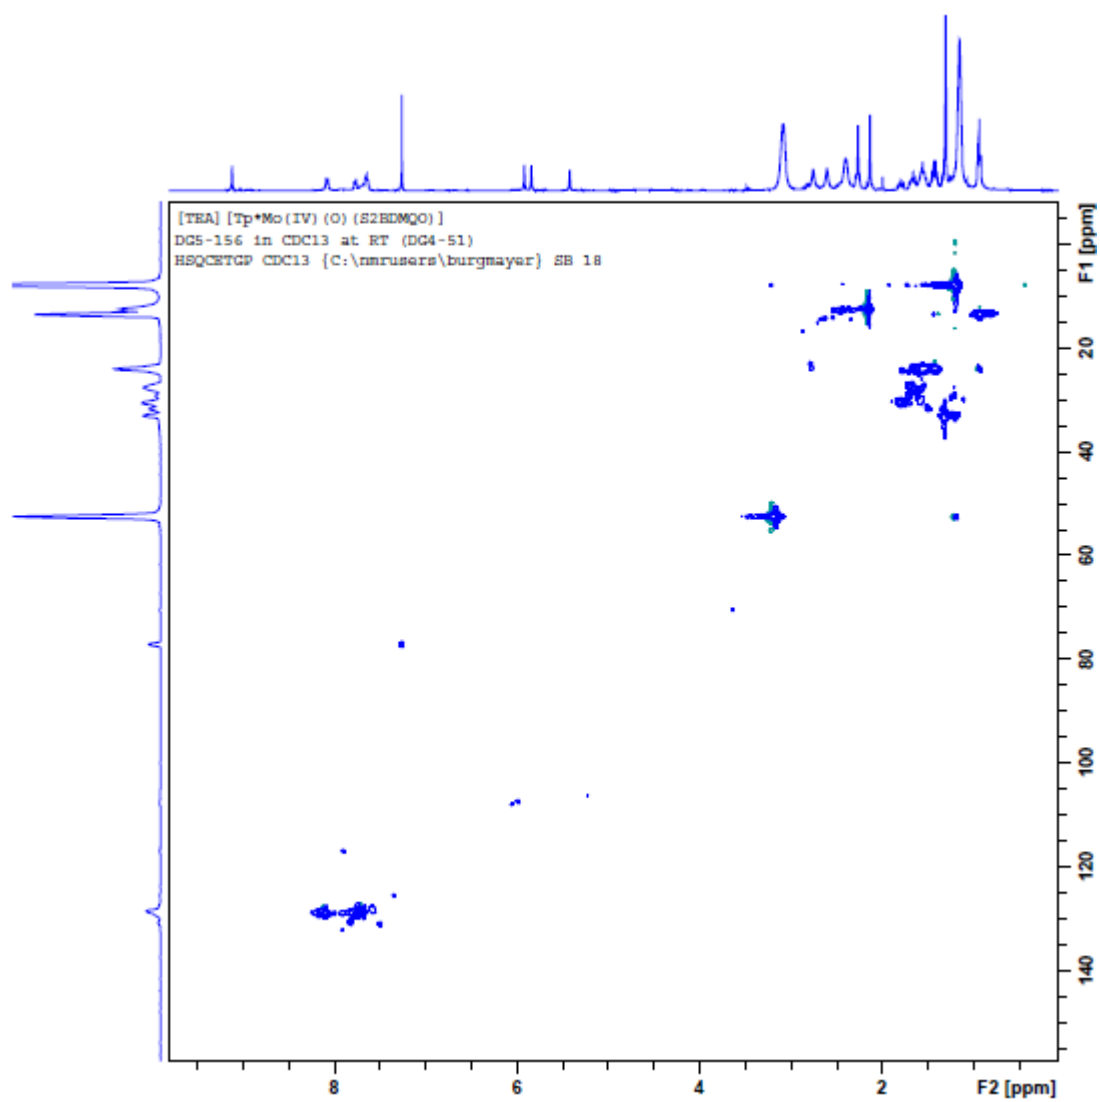

Figure S10. HSQC of [TEA][Tp\*Mo(O)(S<sub>2</sub>BDMQO)] **4** in acetonitrile-d<sup>3</sup>.

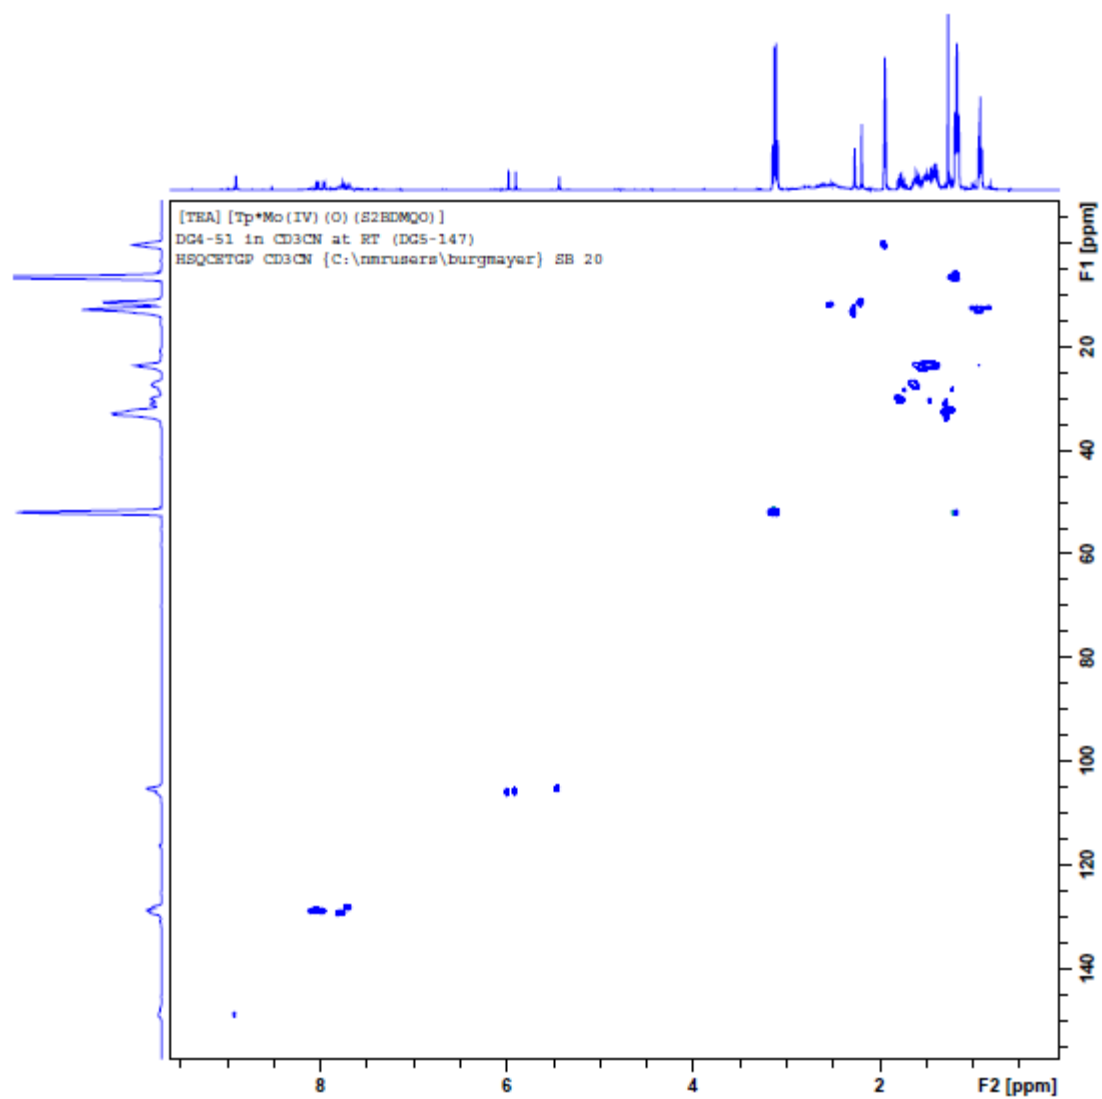

**Figure S11.** HSQC of Tp\*Mo(O)(pyrano-H-S<sub>2</sub>BMOQO) **7** after TFAA addition yielding pyran ring formation in acetonitrile-d<sup>3</sup>.

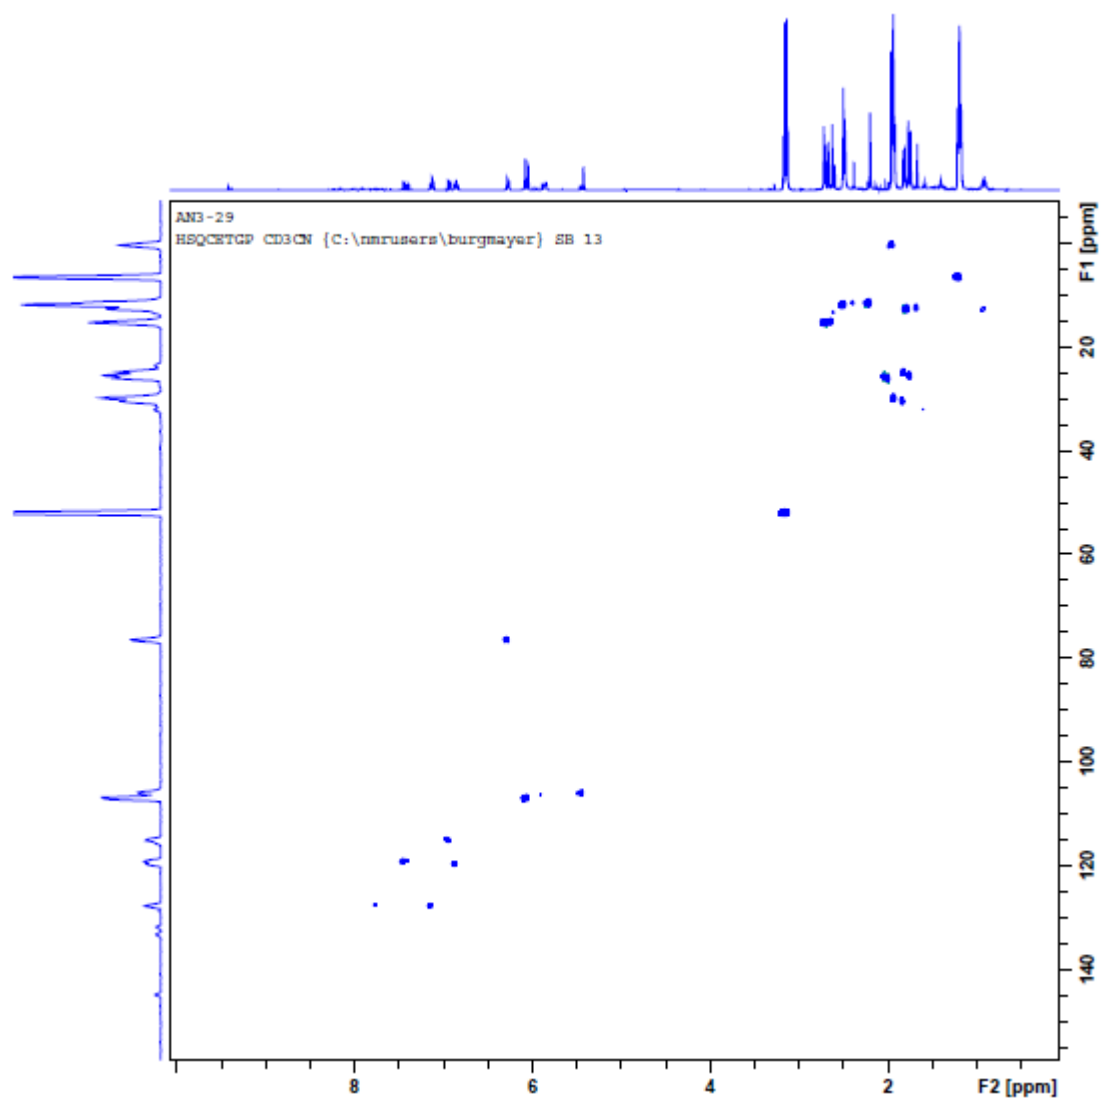

**Figure S12.** HSQC of Tp\*Mo(O)(pyrrolo-S<sub>2</sub>BMOQO) **8** after TFAA addition yielding pyrrole ring formation in acetonitrile-d<sup>3</sup>.

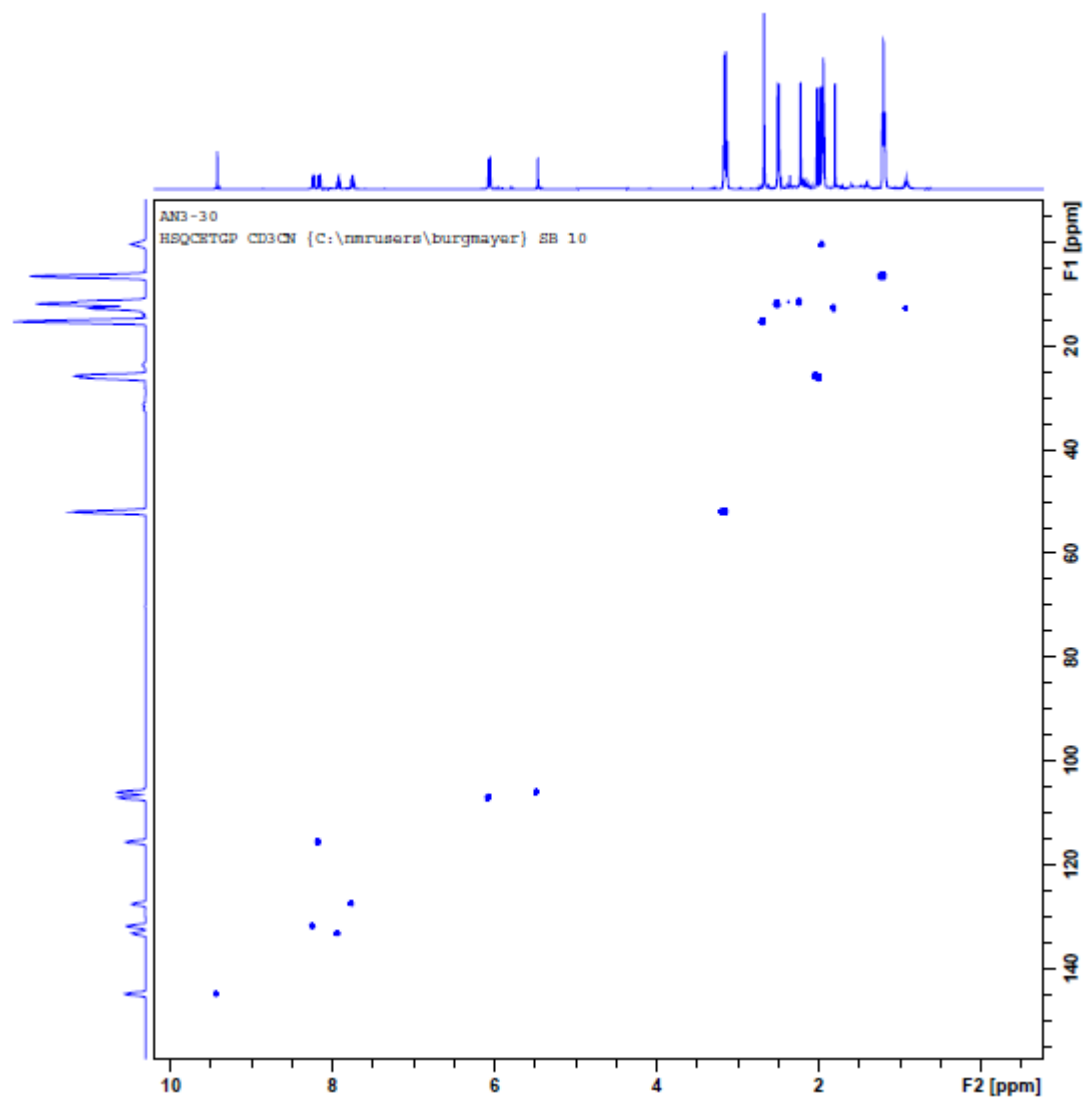

**Figure S13.** UV-vis overlay of **1** (blue) and **2** (red) in acetonitrile at  $3.00 \times 10^{-5}$  M.

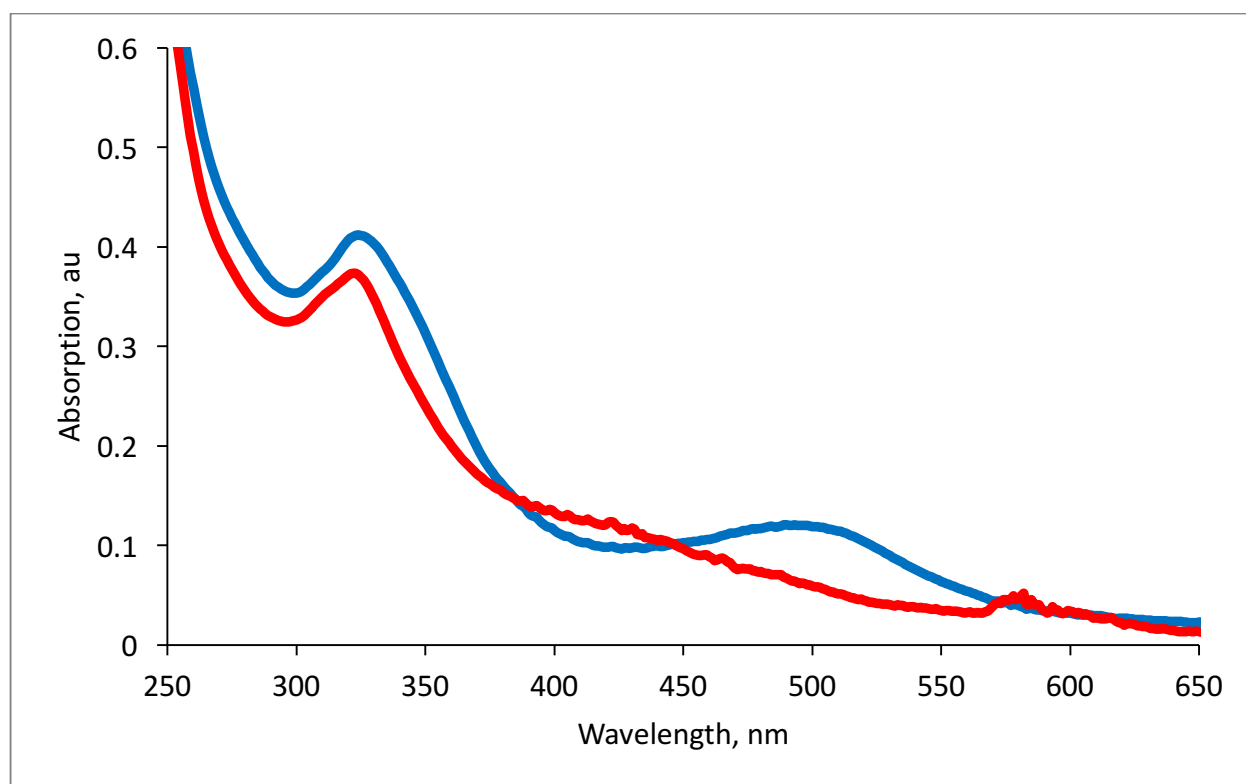

**Figure S14.** Cyclic voltammogram overlay of **1** (blue) and **2** (red) in acetonitrile.

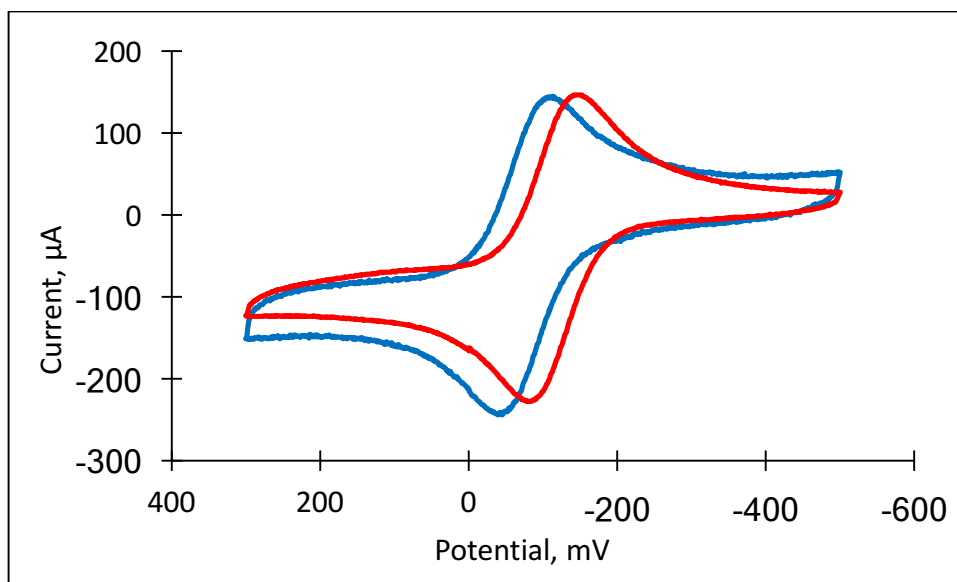

Cyclic voltammograms of the Mo<sup>IV</sup>/Mo<sup>V</sup> couple of **2** (blue) and **4** (red) in 0.10 M (*n*-Bu<sub>4</sub>N)(ClO<sub>4</sub>)/CH<sub>3</sub>CN vs. Ag/AgCl at a Pt working electrode, scan rate 100 mV/s. Mo<sup>IV</sup>/Mo<sup>V</sup> potentials: **1** -566 mV, **2** -681 mV vs. Fc/Fc<sup>+</sup>.

**Table S1.** Cyclic voltammometric data for **2** and **4** in acetonitrile.

| Complex (solvent)                        | Scan rate, mV/s | E(1/2), mV <sup>a</sup> | p <sub>c</sub> – p <sub>a</sub> , mV <sup>b</sup> | i <sub>c</sub> /i <sub>a</sub> , <sup>c</sup> |
|------------------------------------------|-----------------|-------------------------|---------------------------------------------------|-----------------------------------------------|
| <b>2</b> (CH <sub>3</sub> CN)            | 25              | -502                    | 75                                                | 1.04                                          |
| <b>2</b> (CH <sub>3</sub> CN)            | 100             | -503                    | 69                                                | 1.03                                          |
| <b>2</b> (CH <sub>3</sub> CN)            | 400             | -500                    | 63                                                | 0.99                                          |
| <b>2</b> (CH <sub>3</sub> CN)            | 800             | -500                    | 68                                                | 1.00                                          |
| Fc <sup>+</sup> /Fc (CH <sub>3</sub> CN) | 100             | +429                    | 66                                                | 1.05                                          |
|                                          |                 |                         |                                                   |                                               |
| <b>4</b> (CH <sub>3</sub> CN)            | 25              | -556                    | 69                                                | 0.95                                          |
| <b>4</b> (CH <sub>3</sub> CN)            | 100             | -552                    | 65                                                | 1.05                                          |
| <b>4</b> (CH <sub>3</sub> CN)            | 400             | -557                    | 61                                                | 1.06                                          |
| <b>4</b> (CH <sub>3</sub> CN)            | 800             | -557                    | 71                                                | 1.01                                          |
| Fc <sup>+</sup> /Fc (CH <sub>3</sub> CN) | 100             | +438                    | 80                                                | 1.08                                          |

<sup>a</sup> Fc<sup>+</sup>/Fc vs. Ag/AgCl

<sup>b</sup> difference between cathodic and anodic potentials

<sup>c</sup> ratio of cathodic to anodic currents

**Figure S15.** Cyclic voltammogram overlay of protonated and non-protonated forms of **2** in chloroform.

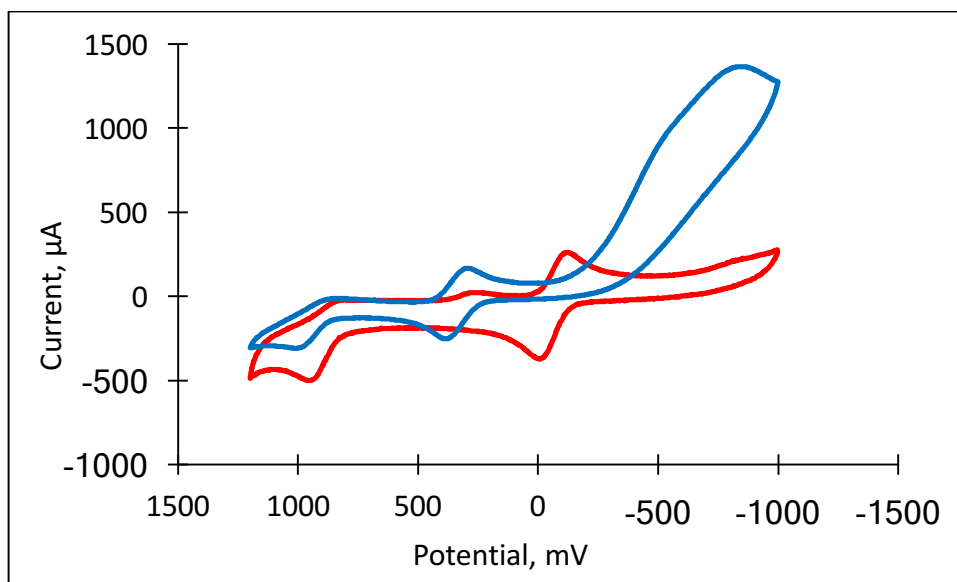

Cyclic voltammograms of the protonated form of **2** (blue) and the non-protonated form of **2** (red) in 0.10 M  $(n\text{-Bu}_4\text{N})(\text{ClO}_4)/\text{CHCl}_3$  vs. Ag/AgCl at a Pt working electrode, scan rate 100 mV/s.  $\text{Mo}^{\text{IV}}/\text{Mo}^{\text{V}}$  potentials: protonated **2** -231 mV, non-protonated **2** -566 mV vs.  $\text{Fc}/\text{Fc}^+$ .

**Figure S16.** Cyclic voltammogram overlay of protonated and non-protonated forms of **2** in acetonitrile.

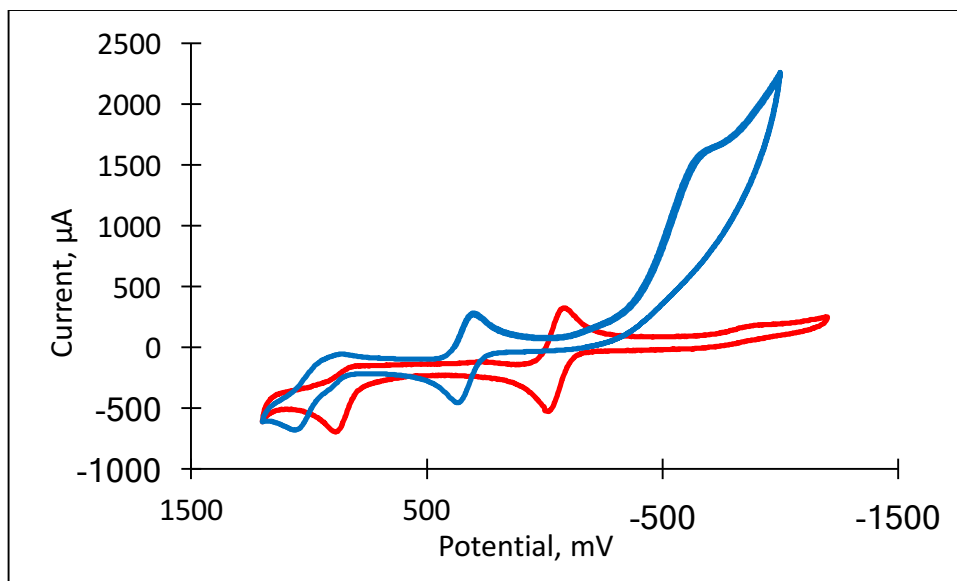

Cyclic voltammograms of the protonated form of **2** (blue) and the non-protonated form of **2** (red) in 0.10 M  $(n\text{-Bu}_4\text{N})(\text{ClO}_4)/\text{CH}_3\text{CN}$  vs. Ag/AgCl at a Pt working electrode, scan rate 100 mV/s.  $\text{Mo}^{\text{IV}}/\text{Mo}^{\text{V}}$  potentials: protonated **2** -135 mV, non-protonated **2** -501 mV vs.  $\text{Fc}/\text{Fc}^+$ .



**Figure S17.** Cyclic voltammogram overlay of protonated and non-protonated forms of **4** in chloroform.

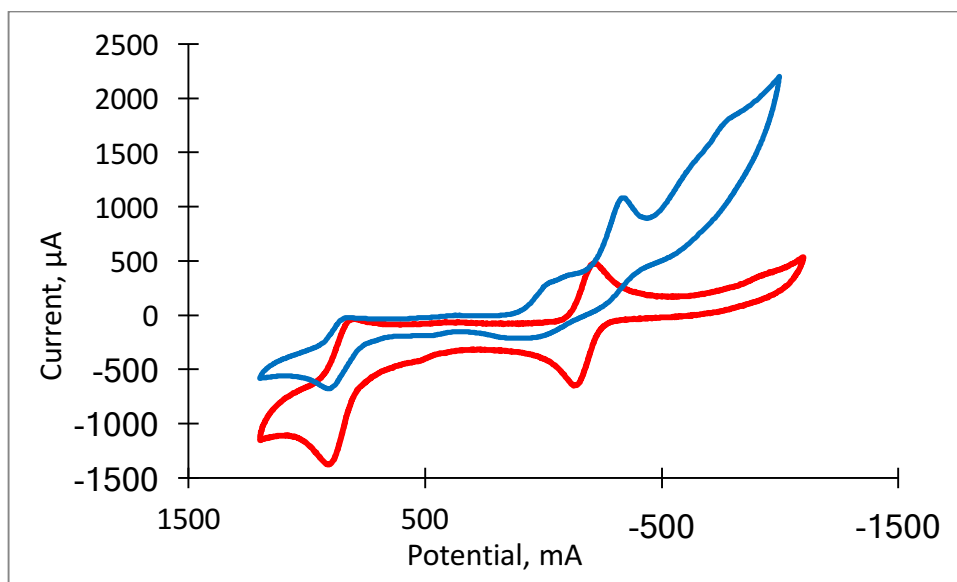

Cyclic voltammograms of the protonated form of **4** (blue) and the non-protonated form of **4** (red) in 0.10 M (*n*-Bu<sub>4</sub>N)(ClO<sub>4</sub>)/CHCl<sub>3</sub> vs. Ag/AgCl at a Pt working electrode, scan rate 100 mV/s.

**Figure S18.** Cyclic voltammogram overlay of protonated and non-protonated forms of **4** in acetonitrile.

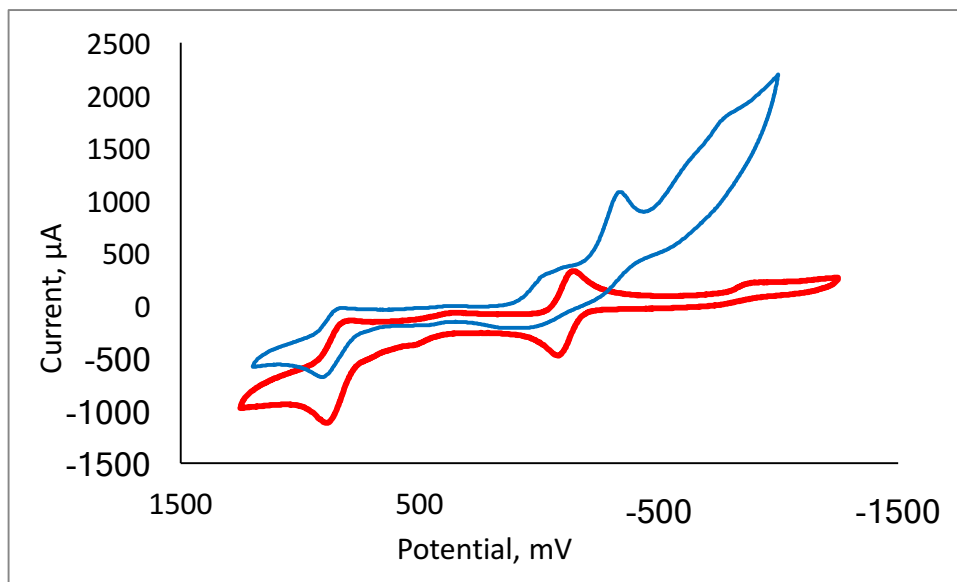

Cyclic voltammograms of the protonated form of **4** (blue) and the non-protonated form of **4** (red) in 0.10 M (*n*-Bu<sub>4</sub>N)(ClO<sub>4</sub>)/CH<sub>3</sub>CN vs. Ag/AgCl at a Pt working electrode, scan rate 100 mV/s.

**Table S1.** Summary of X-ray crystal structure data for complexes **2** and **4**.

|                                                | <b>2</b>                                                                                        | <b>4</b>                                                          |
|------------------------------------------------|-------------------------------------------------------------------------------------------------|-------------------------------------------------------------------|
| Formula                                        | C <sub>38</sub> H <sub>58</sub> BCl <sub>2</sub> MoN <sub>9</sub> O <sub>2</sub> S <sub>2</sub> | C <sub>37</sub> H <sub>56</sub> BMoN <sub>9</sub> OS <sub>2</sub> |
| Fw                                             | 914.70                                                                                          | 813.77                                                            |
| Cryst Syst                                     | Orthorhombic                                                                                    | Orthorhombic                                                      |
| space group:                                   | Pbcn                                                                                            | Pbcn                                                              |
| <i>a</i> (Å)                                   | 27.8479 (14)                                                                                    | 30.2788 (14)                                                      |
| <i>b</i> (Å)                                   | 19.8016 (10)                                                                                    | 19.0169 (8)                                                       |
| <i>c</i> (Å)                                   | 17.9310 (9)                                                                                     | 18.1264 (8)                                                       |
| <i>α</i> (deg)                                 | 90                                                                                              | 90                                                                |
| <i>β</i> (deg)                                 | 90                                                                                              | 90                                                                |
| <i>γ</i> (deg)                                 | 90                                                                                              | 90                                                                |
| <i>V</i> (Å <sup>3</sup> )                     | 9887.7 (9)                                                                                      | 10437.3 (8)                                                       |
| <i>Z</i>                                       | 8                                                                                               | 8                                                                 |
| <i>ρ</i> <sub>calc</sub> (g/cm <sup>-3</sup> ) | 1.229                                                                                           | 1.036                                                             |
| <i>T</i> (K)                                   | 200                                                                                             | 200                                                               |
| radiation, λ (Å)                               | 0.71073                                                                                         | 0.71073                                                           |
| Abs coeff (mm <sup>-1</sup> )                  | 0.497                                                                                           | 0.363                                                             |
| wR <sub>2</sub> (%)                            | 16.02                                                                                           | 18.08                                                             |
| R <sub>1</sub> (%)                             | 5.38                                                                                            | 5.46                                                              |
| GOF                                            | 1.033                                                                                           | 1.025                                                             |

**Figure S19.** UV-Vis time course study over 22 hours for reactions resulting from the protonation of **2** upon addition of 1 eq. of TFAA in  $\text{CHCl}_3$ . Red line: spectrum recorded immediately after 1 eq TFAA is added to **2** in  $\text{CHCl}_3$  corresponding to **7**. Blue line: spectrum of final product **8**.

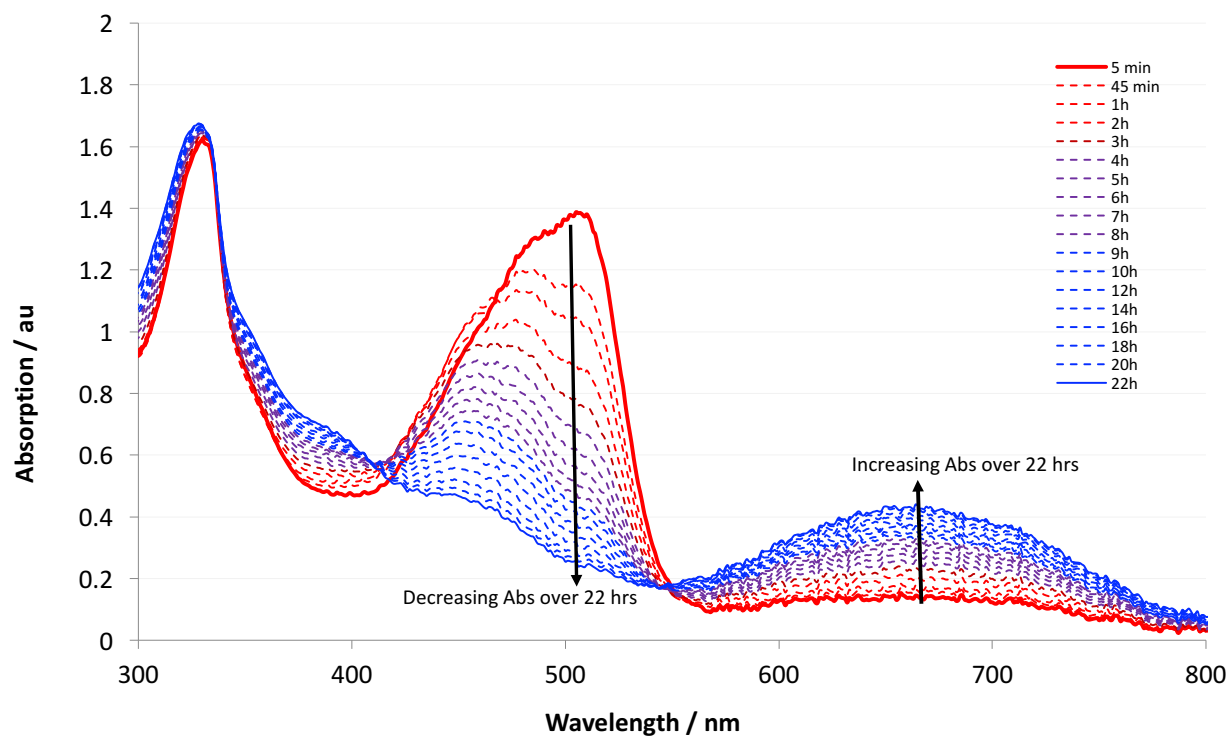

Supplement: NIHMS1031051-supplement-SI.pdf [file NIHMS1031051-supplement-SI.pdf]
